# Supplementary material
Source: PubMed Central journal article supplement (PMC7948114)

## Supplementary Online Content

Khera R, Haimovich J, Hurley NC, et al. Use of machine learning models to predict death after acute myocardial infarction. *JAMA Cardiol*. Published online March 10, 2021. doi:10.1001/jamacardio.2021.0122

### **eMethods.** Supplementary Methods

**eTable 1.** Differences in Characteristics of Patients Excluded vs Included in the Analyses

**eTable 2.** List of Patient Variables Used in Modeling

**eTable 3.** Shift Table Representing Actual Observed Event Rates for Pairs of Models

**eTable 4.** Shift Tables for Sensitivity Analysis With Risk Thresholds for Shift Tables Set at Risk <1.5%, 1.5-3%, >3%, Each Model Trained With Expanded Variables From the Chest Pain-MI Registry

**eTable 5.** Area Under the Receiver Operator Characteristic Curve for the 5-Fold Multiple Imputation

**eTable 6.** Model Calibration Slopes in Patient Subgroups

**eFigure 1.** Derivation of Brier Score Components Based on Calibration Curve

**eFigure 2.** Receiver Operator Characteristic for Logistic Regression, Neural Network (NN), XGBoost, and Meta-Classifer Models, Developed Using Variables Included in the Current Model for In-hospital Mortality by McNamara et al

**eFigure 3.** Precision-Recall Curves for Logistic Regression, Neural Network (NN), XGBoost, and Meta-Classifer Models, Developed Using Variables Included in the Current Model for In-hospital Mortality by McNamara et al

**eFigure 4.** Receiver Operator Characteristic for Logistic Regression, Neural Network (NN), XGBoost, and Meta-Classifer Models, Developed Using the Expanded Set of Variables in the Chest Pain-MI Registry

**eFigure 5.** Precision-Recall Curves for Logistic Regression, Neural Network (NN), XGBoost, and Meta-Classifer Models, Developed Using the Expanded Set of Variables in the Chest Pain-MI Registry

**eFigure 6.** Mean Squared Prediction Error of Machine Learning Models Compared With Logistic Regression

**eFigure 7.** Calibration of Models Developed Using Limited Number of Variables Included in the Current Standard (McNamara et al)

**eFigure 8.** Calibration of Models Developed Using Expanded Number of Variables Included in the Chest Pain-MI Registry

This supplementary material has been provided by the authors to give readers additional information about their work.

## **eMethods.** Supplementary Methods

### **Mean squared prediction error**

To calculate the prediction error, we created a Bernoulli distribution using the probability of the inverse logit of the prediction at an individual-level, so that a prediction for an individual is either 0 or 1, and we compared the actual value of 0 or 1. A root mean square of this prediction across all patients was reported as the mean squared prediction error.

### **Measures of calibration**

We also calculate the F-score, sensitivity, specificity, positive predictive value (PPV), negative predictive value (NPV). The F-score is the harmonic mean of the sensitivity and PPV at a certain risk threshold, which classifies an individual risk estimate as either a death (if above the threshold) or no death (if below the threshold). Once a risk threshold is set, the number of true positives, false positives, true negatives, and false negatives can be calculated and used to derive sensitivity, specificity, PPV, and NPV. Here, the risk threshold associated with the highest F-score was selected as the overall risk-threshold for the method, and used to determine the sensitivity, specificity, PPV, and NPV for the overall model. The risk threshold is therefore determined using a data-driven approach and optimized for each model. The F-score is the harmonic mean of the sensitivity and PPV at a certain risk threshold, which classifies an individual risk estimate as either a death (if above the threshold) or no death (if below the threshold).

**eTable 1.** Differences in Characteristics of Patients Excluded vs Included in the Analyses

|                                   | Excluded patients (N = 191,195) |         | Included patients (N = 755,402) |         |
|-----------------------------------|---------------------------------|---------|---------------------------------|---------|
|                                   | Mean (SD) or N (%)              | Missing | Mean (SD) or N (%)              | Missing |
| <b>Demographics</b>               |                                 |         |                                 |         |
| Age, years                        | 64.4 (13.7)                     | 0       | 64.6 (13.7)                     | 0       |
| Weight, kg                        | 86.5 (22.3)                     | 566     | 87.0 (22.1)                     | 1421    |
| Female                            | 66,349 (34.7%)                  | 0       | 260,200 (34.4%)                 | 0       |
| Race white                        | 161,417 (84.4%)                 | 0       | 640,995 (84.9%)                 | 0       |
| Race black                        | 21,612 (11.3%)                  | 0       | 87,089 (11.5%)                  | 0       |
| <b>Medical History</b>            |                                 |         |                                 |         |
| History of diabetes mellitus      | 64,869 (34.0%)                  | 392     | 257,072 (34.0%)                 | 144     |
| History of hypertension           | 141,071 (73.9%)                 | 257     | 562,423 (74.5%)                 | 74      |
| History of dyslipidemia           | 189 (78.1%)                     | 190953  | 461,269 (61.1%)                 | 127     |
| Current/recent smoker             | 64,963 (34.0%)                  | 246     | 253,829 (33.6%)                 | 145     |
| Current dialysis                  | 29 (27.4%)                      | 191089  | 68,086 (14.4%)                  | 283305  |
| History of MI                     | 5,176 (2.7%)                    | 603     | 19,055 (2.5%)                   | 244     |
| History of HF                     | 60 (38.7%)                      | 191040  | 188,297 (24.9%)                 | 175     |
| Prior PCI                         | 57 (40.1%)                      | 191053  | 94,897 (12.6%)                  | 704     |
| Prior CABG                        | -                               | 191195  | 193,179 (25.6%)                 | 0       |
| History of atrial fibrillation    | 54 (36.2%)                      | 191046  | 100,897 (13.4%)                 | 393     |
| Prior cerebrovascular disease     | 38 (24.5%)                      | 191040  | 62,312 (8.3%)                   | 519     |
| Prior peripheral arterial disease | 20,293 (10.6%)                  | 372     | 91,723 (12.1%)                  | 148     |
| <b>Presentation</b>               |                                 |         |                                 |         |
| Presentation after cardiac arrest | 8,499 (4.5%)                    | 2047    | 29,458 (3.9%)                   | 2581    |
| In cardiogenic shock              | 8,180 (4.3%)                    | 384     | 28,783 (3.8%)                   | 584     |
| In HF                             | 22,569 (11.8%)                  | 306     | 95,240 (12.6%)                  | 529     |
| Heart rate                        | 84.1 (24.3)                     | 1089    | 84.0 (23.9)                     | 2216    |
| SBP at presentation               | 145.7 (35.8)                    | 1166    | 146.5 (35.2)                    | 2678    |
| <b>Presentation ECG</b>           |                                 |         |                                 |         |

|                                                 |                |      |                 |       |
|-------------------------------------------------|----------------|------|-----------------|-------|
| STEMI                                           | 85,634 (44.8%) | 0    | 292,784 (38.8%) | 0     |
| New or presumed new ST-depressions              | 16,772 (8.8%)  | 0    | 83,555 (11.1%)  | 0     |
| New or presumed new T-wave inversions           | 11,078 (5.8%)  | 0    | 56,791 (7.5%)   | 0     |
| Transient ST-segment elevation lasting < 20 min | 1,920 (1.0%)   | 0    | 8,279 (1.1%)    | 0     |
| <b>Initial laboratory values</b>                |                |      |                 |       |
| Troponin Ratio                                  | 7.8 (8.3)      | 4088 | 7.3 (8.1)       | 12071 |
| Creatinine, mg/dl                               | 1.3 (1.2)      | 1098 | 1.3 (1.2)       | 4404  |
| Creatinine clearance, ml/min                    | 85.4 (42.9)    | 1634 | 85.2 (42.5)     | 5756  |
| Hemoglobin, g/dl                                | 13.7 (2.2)     | 1141 | 13.8 (2.2)      | 4426  |
| <b>Outcome</b>                                  |                |      |                 |       |
| In-hospital Mortality                           | 9432 (4.9%)    | 0    | 33,468 (4.4%)   | 0     |

**eTable 2.** List of Patient Variables Used in Modeling

|                                 | Model Variables                                              |
|---------------------------------|--------------------------------------------------------------|
| Demographics                    | Age*                                                         |
|                                 | Weight, kg*                                                  |
|                                 | BMI kg/m <sup>2</sup>                                        |
|                                 | Sex*                                                         |
|                                 | Race (White, Black, Asian, American Indian, Native Hawaiian) |
|                                 | Hispanic origin                                              |
| Medical History                 | History of diabetes mellitus*                                |
|                                 | Diabetes control                                             |
|                                 | History of hypertension*                                     |
|                                 | History of dyslipidemia*                                     |
|                                 | Current/recent smoker*                                       |
|                                 | Current dialysis*                                            |
|                                 | Chronic lung disease*                                        |
|                                 | History of MI*                                               |
|                                 | History of heart failure*                                    |
|                                 | Prior PCI*                                                   |
|                                 | Prior CABG*                                                  |
|                                 | History of atrial fibrillation*                              |
|                                 | Prior cerebrovascular disease*                               |
|                                 | Prior peripheral artery disease*                             |
|                                 | Prior stroke                                                 |
| Prior transient ischemic attack |                                                              |
| Presentation                    | After Cardiac Arrest*                                        |
|                                 | In Cardiogenic shock*                                        |
|                                 | In heart failure*                                            |
|                                 | Heart rate, bpm*                                             |
|                                 | SBP, mmHg*                                                   |
| Presentation ECG                | ST-elevation myocardial infarction*                          |
|                                 | New or presumed new ST-segment depression*                   |
|                                 | New or presumed new T-wave inversion*                        |
|                                 | Transient ST-segment elevation < 20 minutes*                 |
|                                 | ST elevation                                                 |
|                                 | Left bundle branch block                                     |
|                                 | Isolated posterior MI                                        |
| Home Medications                | Aspirin                                                      |
|                                 | Clopidogrel                                                  |
|                                 | ACE inhibitor                                                |
|                                 | Angiotensin receptor blocker                                 |
|                                 | Beta blocker                                                 |
|                                 | Statin                                                       |
|                                 | Non-statin lipid-lowering agent                              |
|                                 | Prasugrel                                                    |

|                          |                              |
|--------------------------|------------------------------|
|                          | Warfarin                     |
|                          | Aldosterone blocking agent   |
| Initial Laboratory Tests | Initial CKMB collected       |
|                          | Initial Troponin collected   |
|                          | Initial Creatinine collected |
|                          | Initial Hemoglobin collected |
|                          | Lipid panel collected        |
|                          | Initial BNP collected        |
|                          | Initial pro-BNP collected    |
|                          | Troponin Ratio*              |
|                          | Creatinine mg/dL*            |
|                          | Creatinine Clearance*        |
|                          | Hemoglobin, g/dL*            |

\*denotes model variables used in McNamara et al. study.<sup>9</sup> Creatinine clearance calculated via Cockcroft-Gault equation.

**eTable 3.** Shift Table Representing Actual Observed Event Rates for Pairs of Models

**3A: Logistic regression (LR) vs extreme gradient descent boosting (XGB), both trained with limited variables used by McNamara et al.**

|              | McNamara LR              |                          |                          |                          |
|--------------|--------------------------|--------------------------|--------------------------|--------------------------|
|              | <1%                      | 1-5%                     | >5%                      | All                      |
| McNamara XGB | N Patients Observed Rate |
| <1%          | 68,818<br>0.33%          | 25,228<br>0.80%          | 179<br>0.00%             | 94,225<br>0.46%          |
| 1-5%         | 5,577<br>1.42%           | 51,584<br>2.47%          | 6,760<br>4.87%           | 63,921<br>2.63%          |
| >5%          | 135<br>2.22%             | 4,809<br>6.09%           | 27,394<br>20.81%         | 32,338<br>18.54%         |
| All          | 74,530<br>0.42%          | 81,621<br>2.16%          | 34,333<br>17.56%         | 190,484<br>4.26%         |

**3B: Logistic regression (LR) vs Neural Network (NN), both trained with limited variables used by McNamara et al.**

|             | McNamara LR              |                          |                          |                          |
|-------------|--------------------------|--------------------------|--------------------------|--------------------------|
|             | <1%                      | 1-5%                     | >5%                      | All                      |
| McNamara NN | N Patients Observed Rate |
| <1%         | 72,909<br>0.40%          | 30,143<br>1.13%          | 31<br>9.68%              | 103,083<br>0.62%         |
| 1-5%        | 1,596<br>1.13%           | 48,772<br>2.59%          | 7,009<br>6.38%           | 57,377<br>3.02%          |
| >5%         | 25<br>0.00%              | 2,706<br>5.95%           | 27,293<br>20.44%         | 30,024<br>19.12%         |
| All         | 74,530<br>0.42%          | 81,621<br>2.16%          | 34,333<br>17.56%         | 190,484<br>4.26%         |

**3C: Logistic regression (LR) vs XGBoost (XGB), both trained with expanded variables from the Chest pain-MI registry.**

|  | Expanded LR |            |            |            |
|--|-------------|------------|------------|------------|
|  | <1%         | 1-5%       | >5%        | All        |
|  | N Patients  | N Patients | N Patients | N Patients |

| <b>Expanded XGB</b> | <b>Observed Rate</b> | <b>Observed Rate</b> | <b>Observed Rate</b> | <b>Observed Rate</b> |
|---------------------|----------------------|----------------------|----------------------|----------------------|
| <1%                 | 65,193<br>0.27%      | 31,971<br>0.65%      | 422<br>1.18%         | 97,586<br>0.40%      |
| 1-5%                | 3,384<br>0.95%       | 44,486<br>2.21%      | 13,155<br>3.91%      | 61,025<br>2.51%      |
| >5%                 | 68<br>2.94%          | 2,899<br>6.21%       | 28,906<br>20.79%     | 31,873<br>19.42%     |
| All                 | 68,645<br>0.30%      | 79,356<br>1.73%      | 42,483<br>15.37%     | 190,484<br>4.26%     |

**3D: Logistic regression (LR) vs Neural Network (NN), both trained with expanded variables from the Chest pain-MI registry.**

|                    | <b>Expanded LR</b>                  |                                     |                                     |                                     |
|--------------------|-------------------------------------|-------------------------------------|-------------------------------------|-------------------------------------|
|                    | <b>&lt;1%</b>                       | <b>1-5%</b>                         | <b>&gt;5%</b>                       | <b>All</b>                          |
| <b>Expanded NN</b> | <b>N Patients<br/>Observed Rate</b> | <b>N Patients<br/>Observed Rate</b> | <b>N Patients<br/>Observed Rate</b> | <b>N Patients<br/>Observed Rate</b> |
| <1%                | 63,271<br>0.27%                     | 18,909<br>0.67%                     | 91<br>4.40%                         | 82,271<br>0.37%                     |
| 1-5%               | 5,349<br>0.67%                      | 53,097<br>1.79%                     | 7,307<br>4.83%                      | 65,753<br>2.04%                     |
| >5%                | 25<br>0.00%                         | 7,350<br>4.00%                      | 35,085<br>17.59%                    | 42,460<br>15.23%                    |
| All                | 68,645<br>0.30%                     | 79,356<br>1.73%                     | 42,483<br>15.37%                    | 190,484<br>4.26%                    |



**3E: Logistic regression (LR) trained with limited variables vs LR trained with expanded variables from the Chest pain-MI registry.**

|             | McNamara LR              |                          |                          |                          |
|-------------|--------------------------|--------------------------|--------------------------|--------------------------|
|             | <1%                      | 1-5%                     | >5%                      | All                      |
| Expanded LR | N Patients Observed Rate |
| <1%         | 62,341<br>0.28%          | 6,303<br>0.48%           | 1<br>0.00%               | 68,645<br>0.30%          |
| 1-5%        | 12,029<br>0.96%          | 63,489<br>1.69%          | 3,838<br>4.77%           | 79,356<br>1.73%          |
| >5%         | 160<br>11.88%            | 11,829<br>5.60%          | 30,494<br>19.17%         | 42,483<br>15.37%         |
| All         | 74,530<br>0.42%          | 81,621<br>2.16%          | 34,333<br>17.56%         | 190,484<br>4.26%         |

**3F: Logistic regression (LR) trained with limited variables vs XgBoost (XgB) trained with expanded variables from the Chest pain-MI registry.**

|              | McNamara LR              |                          |                          |                          |
|--------------|--------------------------|--------------------------|--------------------------|--------------------------|
|              | <1%                      | 1-5%                     | >5%                      | All                      |
| Expanded XGB | N Patients Observed Rate |
| <1%          | 67,202<br>0.29%          | 30,104<br>0.62%          | 280<br>2.14%             | 97,586<br>0.40%          |
| 1-5%         | 7,050<br>1.38%           | 45,152<br>2.36%          | 8,823<br>4.17%           | 61,025<br>2.51%          |
| >5%          | 278<br>7.19%             | 6,365<br>8.09%           | 25,230<br>22.42%         | 31,873<br>19.42%         |
| All          | 74,530<br>0.42%          | 81,621<br>2.16%          | 34,333<br>17.56%         | 190,484<br>4.26%         |

**3G: Logistic regression (LR) trained with limited variables vs Neural Network (NN) trained with expanded variables from the Chest pain-MI registry.**

|             | McNamara LR              |                          |                          |                          |
|-------------|--------------------------|--------------------------|--------------------------|--------------------------|
|             | <1%                      | 1-5%                     | >5%                      | All                      |
| Expanded NN | N Patients Observed Rate |
| <1%         | 66,541<br>0.31%          | 15,688<br>0.60%          | 42<br>0.00%              | 82,271<br>0.37%          |
| 1-5%        | 7,892<br>1.25%           | 54,195<br>1.94%          | 3,666<br>5.21%           | 65,753<br>2.04%          |
| >5%         | 97<br>4.12%              | 11,738<br>5.31%          | 30,625<br>19.07%         | 42,460<br>15.23%         |
| All         | 74,530<br>0.42%          | 81,621<br>2.16%          | 34,333<br>17.56%         | 190,484<br>4.26%         |

**3H: Logistic regression (LR) trained with limited variables vs Meta classifier model (Meta) trained with expanded variables from the Chest pain-MI registry.**

|               | McNamara LR              |                          |                          |                          |
|---------------|--------------------------|--------------------------|--------------------------|--------------------------|
|               | <1%                      | 1-5%                     | >5%                      | All                      |
| Expanded Meta | N Patients Observed Rate |
| <1%           | 67,974<br>0.29%          | 28,428<br>0.62%          | 128<br>0.00%             | 96,530<br>0.39%          |
| 1-5%          | 6,387<br>1.49%           | 45,122<br>2.24%          | 6,180<br>3.87%           | 57,689<br>2.33%          |
| >5%           | 169<br>9.47%             | 8,071<br>7.19%           | 28,025<br>20.66%         | 36,265<br>17.61%         |
| All           | 74,530<br>0.42%          | 81,621<br>2.16%          | 34,333<br>17.56%         | 190,484<br>4.26%         |

Three categories of predicted risk based on the logistic regression are compared against the predicted risk for the same patients using XGBoost model, neural network, and the meta-classifier (bottom third), further stratified based on the variables used to train the model (variables in the model by McNamara et al vs the expanded variable set). Event rate is reported as a percentage for each cohort, and the cohort size is shown in parentheses.

**eTable 4.** Shift Tables for Sensitivity Analysis With Risk Thresholds for Shift Tables Set at Risk <1.5%, 1.5-3%, >3%, Each Model Trained With Expanded Variables From the Chest Pain-MI Registry

| <b>XGBoost vs Logistic Regression</b> |                      |                      |                      |                      |
|---------------------------------------|----------------------|----------------------|----------------------|----------------------|
|                                       | <b>Expanded LR</b>   |                      |                      |                      |
|                                       | <b>&lt;1.5%</b>      | <b>1.5-3%</b>        | <b>&gt;3%</b>        | <b>All</b>           |
| <b>Expanded XGBoost</b>               | <b>Patients, N</b>   | <b>Patients, N</b>   | <b>Patients, N</b>   | <b>Patients, N</b>   |
|                                       | <b>Observed rate</b> | <b>Observed rate</b> | <b>Observed rate</b> | <b>Observed rate</b> |
| <1.5%                                 | 87,507<br>0.36%      | 22,235<br>0.94%      | 5,779<br>1.32%       | 115,521<br>0.52%     |
| 1.5-3%                                | 3,085<br>1.78%       | 10,828<br>2.19%      | 13,417<br>2.83%      | 27,330<br>2.46%      |
| >3%                                   | 577<br>2.95%         | 2,806<br>3.56%       | 44,250<br>15.18%     | 47,633<br>14.35%     |
| All                                   | 91,169<br>0.42%      | 35,869<br>1.52%      | 63,446<br>11.31%     | 190,484<br>4.26%     |

| <b>Meta-classifier vs Logistic Regression</b> |                      |                      |                      |                      |
|-----------------------------------------------|----------------------|----------------------|----------------------|----------------------|
|                                               | <b>Expanded LR</b>   |                      |                      |                      |
|                                               | <b>&lt;1.5%</b>      | <b>1.5-3%</b>        | <b>&gt;3%</b>        | <b>All</b>           |
| <b>Expanded Meta</b>                          | <b>Patients, N</b>   | <b>Patients, N</b>   | <b>Patients, N</b>   | <b>Patients, N</b>   |
|                                               | <b>Observed rate</b> | <b>Observed rate</b> | <b>Observed rate</b> | <b>Observed rate</b> |
| <1.5%                                         | 88,360<br>0.37%      | 22,698<br>0.99%      | 4,680<br>1.15%       | 115,738<br>0.52%     |
| 1.5-3%                                        | 2,378<br>2.14%       | 9,836<br>2.09%       | 9,636<br>2.30%       | 21,850<br>2.19%      |
| >3%                                           | 431<br>3.02%         | 3,335<br>3.51%       | 49,130<br>14.04%     | 52,896<br>13.28%     |
| All                                           | 91,169<br>0.42%      | 35,869<br>1.52%      | 63,446<br>11.31%     | 190,484<br>4.26%     |

| <b>Neural Network vs Logistic Regression</b> |                    |               |               |            |
|----------------------------------------------|--------------------|---------------|---------------|------------|
|                                              | <b>Expanded LR</b> |               |               |            |
|                                              | <b>&lt;1.5%</b>    | <b>1.5-3%</b> | <b>&gt;3%</b> | <b>All</b> |

| <b>Expanded Neural Network</b> | <b>Patients, N</b><br><b>Observed rate</b> | <b>Patients, N</b><br><b>Observed rate</b> | <b>Patients, N</b><br><b>Observed rate</b> | <b>Patients, N</b><br><b>Observed rate</b> |
|--------------------------------|--------------------------------------------|--------------------------------------------|--------------------------------------------|--------------------------------------------|
| <1.5%                          | 84,335<br>0.37%                            | 14,126<br>1.01%                            | 2,432<br>2.38%                             | 100,893<br>0.51%                           |
| 1.5-3%                         | 6,047<br>1.12%                             | 14,359<br>1.73%                            | 8,386<br>2.59%                             | 28,792<br>1.85%                            |
| >3%                            | 787<br>1.02%                               | 7,384<br>2.11%                             | 52,628<br>13.11%                           | 60,799<br>11.62%                           |
| All                            | 91,169<br>0.42%                            | 35,869<br>1.52%                            | 63,446<br>11.31%                           | 190,484<br>4.26%                           |

**eTable 5.** Area Under the Receiver Operator Characteristic Curve for the 5-Fold Multiple Imputation. Values in square brackets represents 95% confidence intervals.

| <b>Model</b>        | <b>Models Constructed using Limited variables</b> | <b>Models Constructed using Expanded variables</b> |
|---------------------|---------------------------------------------------|----------------------------------------------------|
| Logistic Regression | 0.877 [0.877-0.877]                               | 0.888 [0.888-0.888]                                |
| Neural Network      | 0.874 [0.873-0.875]                               | 0.886 [0.884-0.888]                                |
| XGBoost             | 0.885 [0.884-0.885]                               | 0.897 [0.897-0.898]                                |
| Meta-classifier     | 0.885 [0.885-0.886]                               | 0.898 [0.897-0.898]                                |

**eTable 6.** Model Calibration Slopes in Patient Subgroups

| <b>Group</b>   | <b>Logistic regression</b> | <b>Neural network</b> | <b>XGBoost</b>    | <b>Metaclassifier</b> |
|----------------|----------------------------|-----------------------|-------------------|-----------------------|
| Overall        | 0.93 [0.91, 0.95]          | 0.83 [0.82, 0.85]     | 0.98 [0.96, 1.00] | 0.99 [0.98, 1.00]     |
| Age in years   |                            |                       |                   |                       |
| 18-44          | 0.90 [0.87, 0.93]          | 0.81 [0.77, 0.84]     | 0.98 [0.95, 1.00] | 0.97 [0.94, 1.00]     |
| 45-64          | 0.93 [0.92, 0.94]          | 0.83 [0.82, 0.85]     | 0.97 [0.96, 0.98] | 0.98 [0.96, 1.00]     |
| ≥65            | 0.94 [0.91, 0.97]          | 0.83 [0.81, 0.86]     | 0.99 [0.96, 1.03] | 1.00 [0.99, 1.01]     |
| Sex            |                            |                       |                   |                       |
| Male           | 0.94 [0.92, 0.95]          | 0.84 [0.82, 0.85]     | 0.98 [0.97, 1.00] | 0.99 [0.98, 1.01]     |
| Female         | 0.92 [0.89, 0.95]          | 0.82 [0.80, 0.85]     | 0.97 [0.94, 1.00] | 0.97 [0.96, 0.99]     |
| Race/ethnicity |                            |                       |                   |                       |
| White          | 0.93 [0.92, 0.95]          | 0.83 [0.82, 0.84]     | 0.98 [0.96, 1.00] | 0.99 [0.97, 1.00]     |
| Black          | 0.95 [0.89, 1.00]          | 0.86 [0.83, 0.90]     | 1.00 [0.94, 1.06] | 1.01 [0.97, 1.04]     |

**eFigure 1.** Derivation of Brier Score Components Based on Calibration Curve

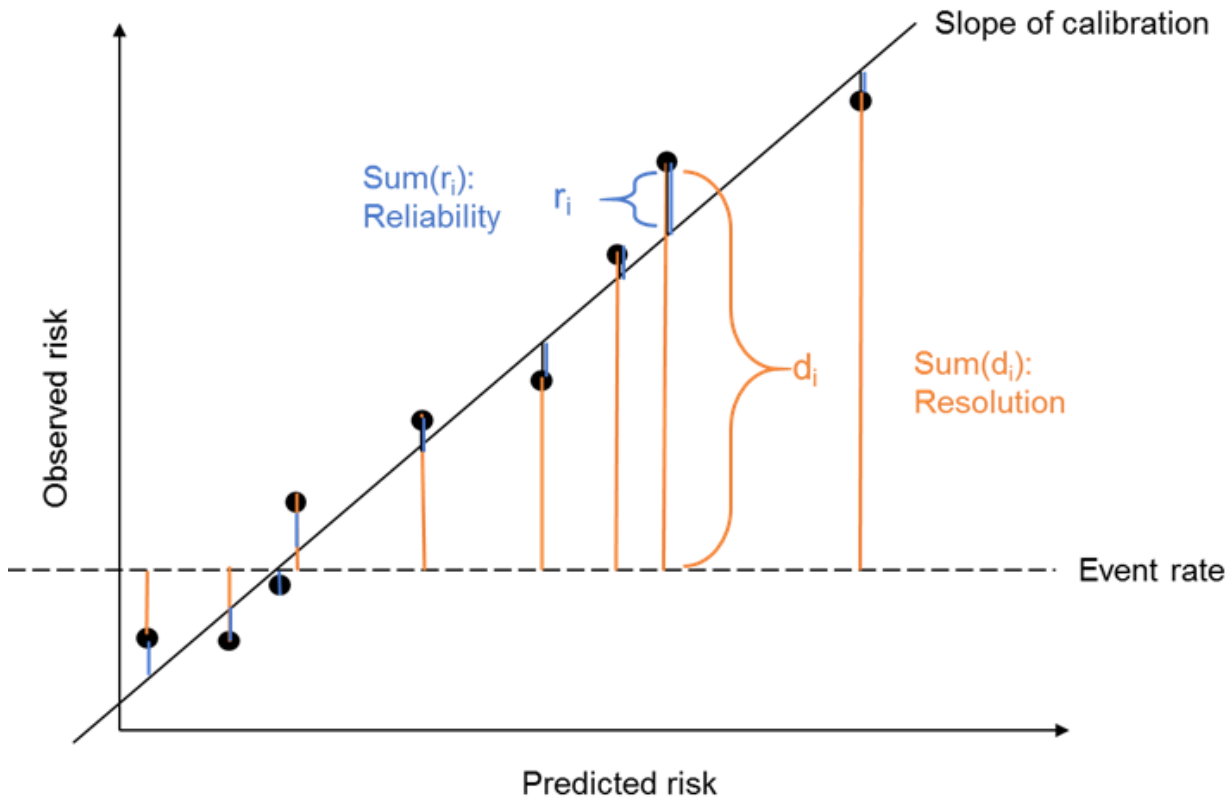

In the figure, each point represents the predicted versus Observed risk at a given decile of risk. Reliability is the sum of the mean-squared error between the deciles of predicted risk and Observed risk, and Resolution is the mean-squared error between deciles of predicted risk and the event rate of the entire cohort

**eFigure 2.** Receiver Operator Characteristic for Logistic Regression, Neural Network (NN), XGBoost, and Meta-Classifer Models, Developed Using Variables Included in the Current Model for In-hospital Mortality by McNamara et al  
They plot the model sensitivity against the false positive rate across a range of all possible risk thresholds for deciding the binary mortality outcome. The black line shows the performance of an imperfect (random) classifier. Area under the curve (or c-statistic) for each model is shown in the legend.

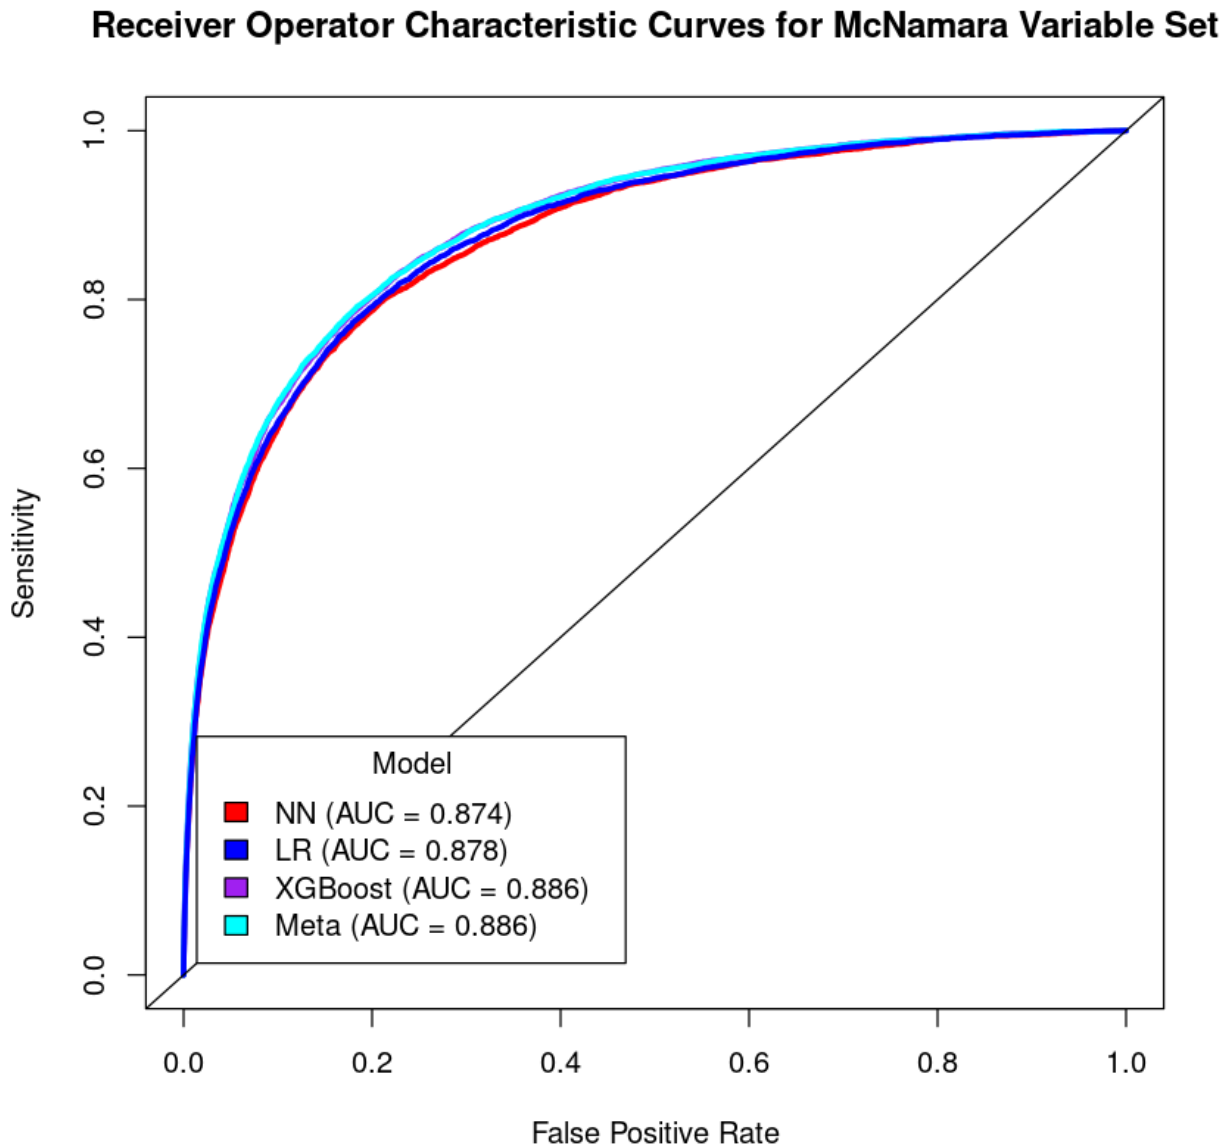



**eFigure 3.** Precision-Recall Curves for Logistic Regression, Neural Network (NN), XGBoost, and Meta-Classifer Models, Developed Using Variables Included in the Current Model for In-hospital Mortality by McNamara et al  
Models with precision-recall curves nearest to the top right-hand corner of the graph have the best performance. Area under the curve for each model is shown in the legend.

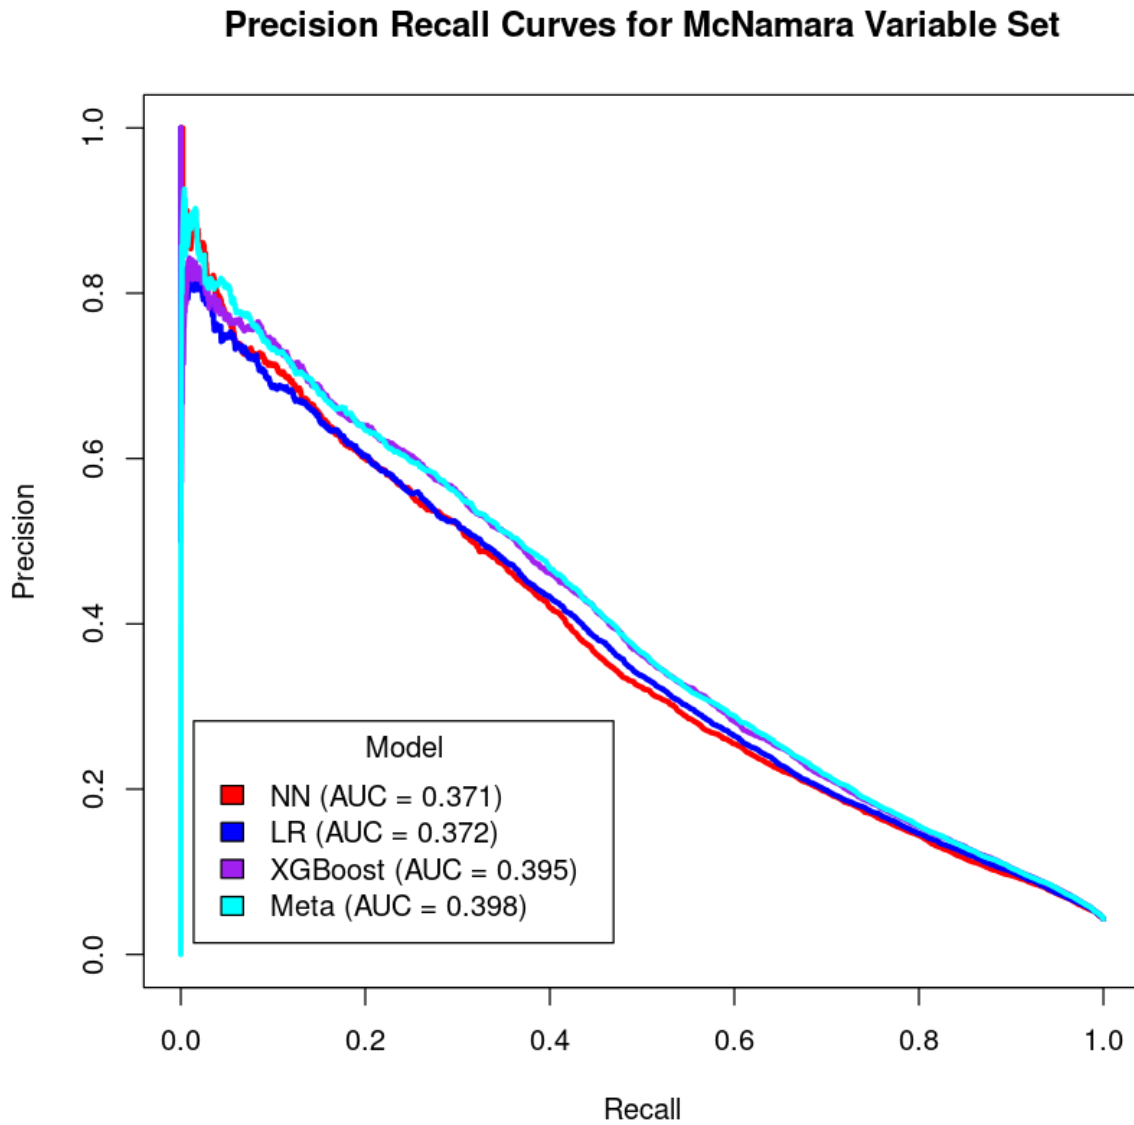

**eFigure 4.** Receiver Operator Characteristic for Logistic Regression, Neural Network (NN), XGBoost, and Meta-Classifer Models, Developed Using the Expanded Set of Variables in the Chest Pain-MI Registry  
They plot the model sensitivity against the false positive rate across a range of all possible risk thresholds for deciding the binary mortality outcome. The black line shows the performance of an imperfect (random) classifier. Area under the curve (or c-statistic) for each model is shown in the legend.

### Receiver Operator Characteristic Curves for Expanded Variable Set

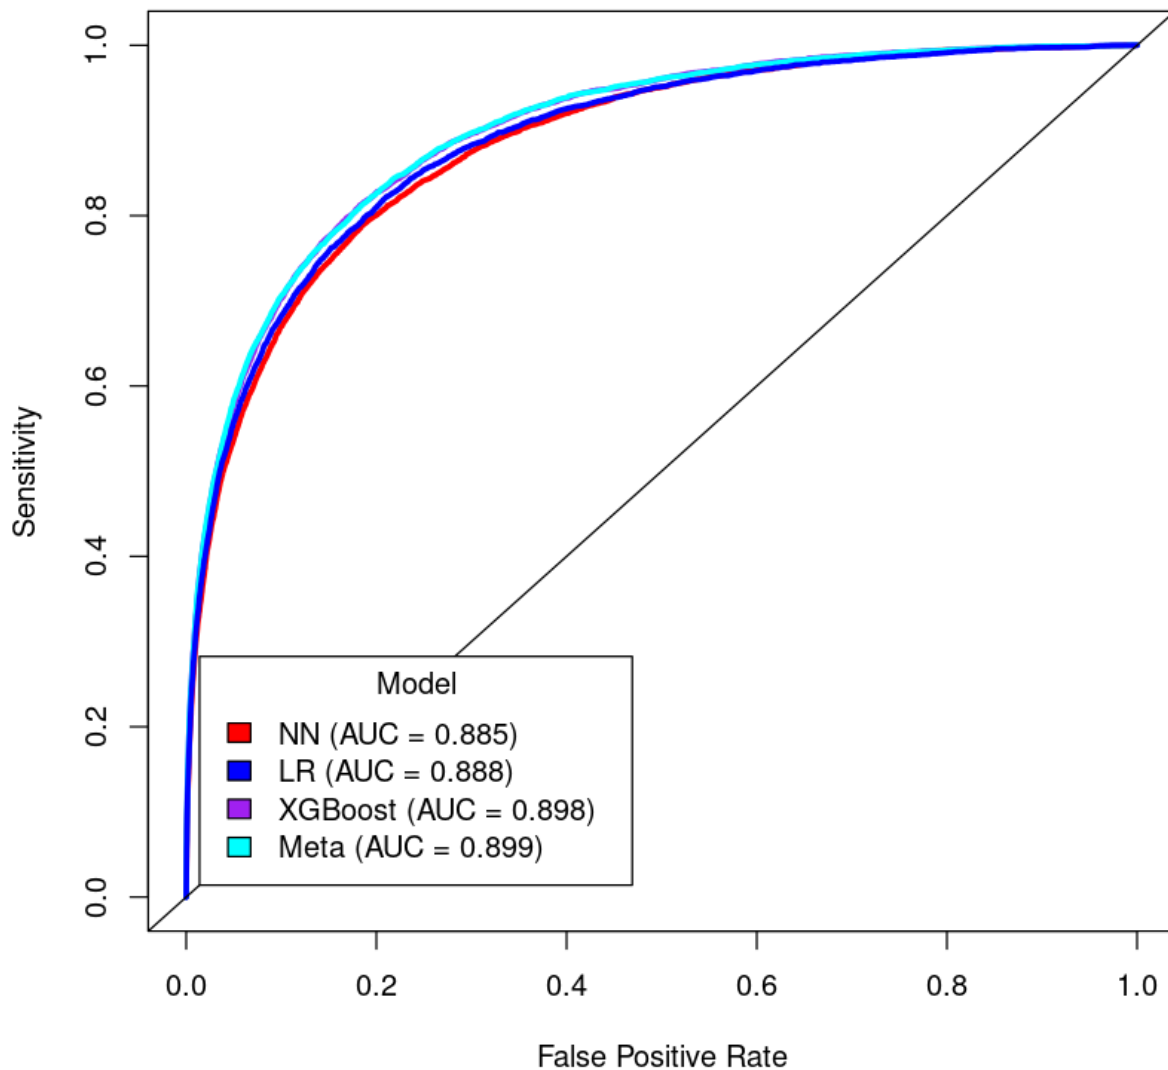

**eFigure 5.** Precision-Recall Curves for Logistic Regression, Neural Network (NN), XGBoost, and Meta-Classifer Models, Developed Using the Expanded Set of Variables in the Chest Pain-MI Registry

Models with precision-recall curves nearest to the top right-hand corner of the graph have the best performance. Area under the curve for each model is shown in the legend.

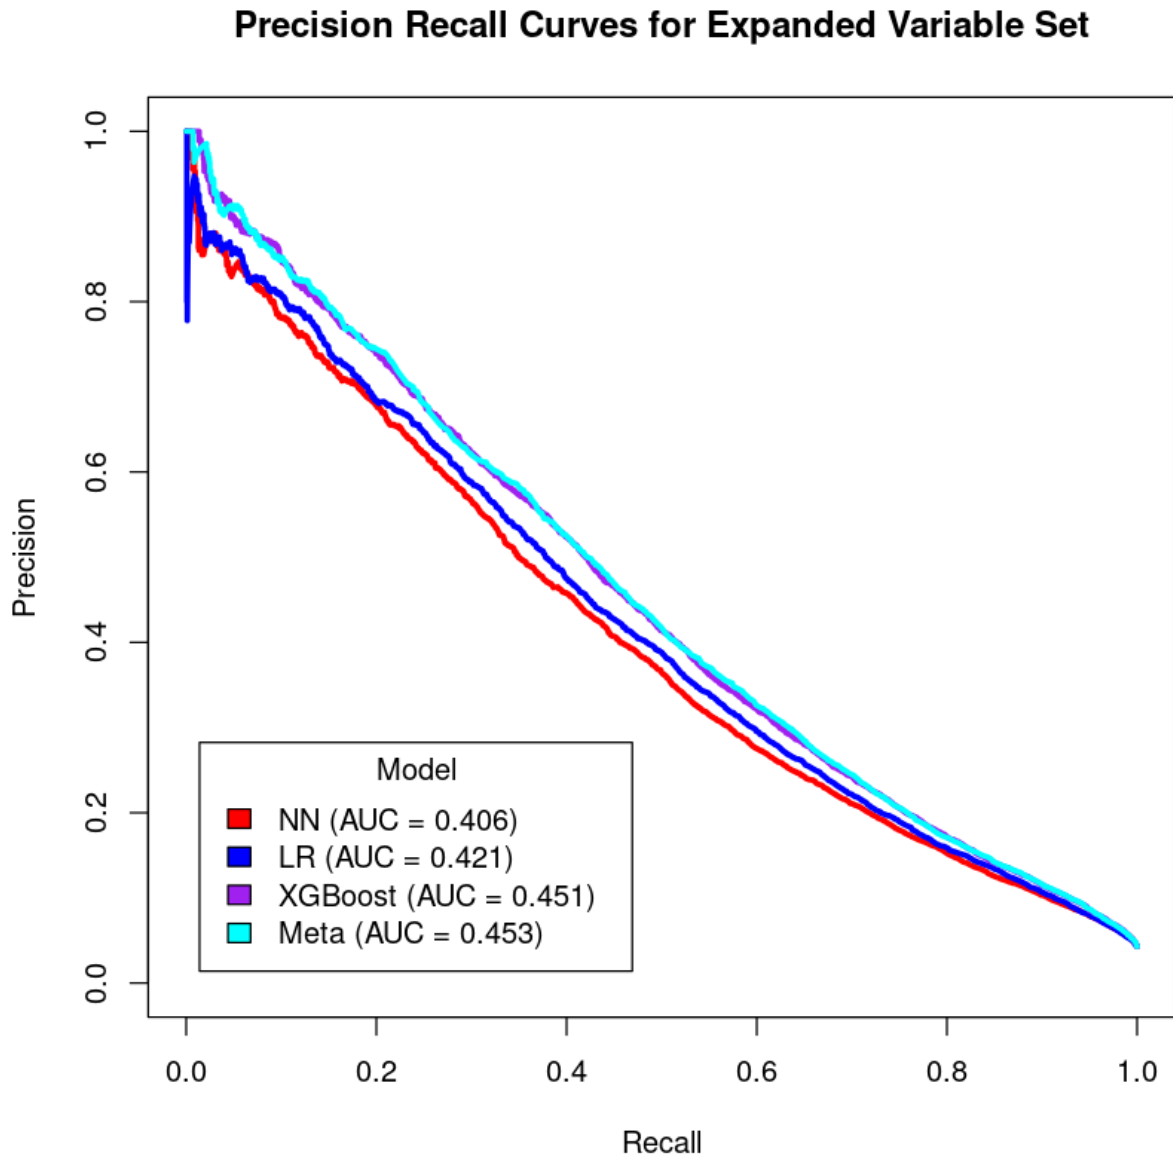

**eFigure 6.** Mean Squared Prediction Error of Machine Learning Models Compared With Logistic Regression

The mean squared prediction error for all machine learning models was lower than logistic regression applied to the same set of variables, including the variables used by the current standard (McNamara et al) and all variable available in the Chest pain-MI registry.

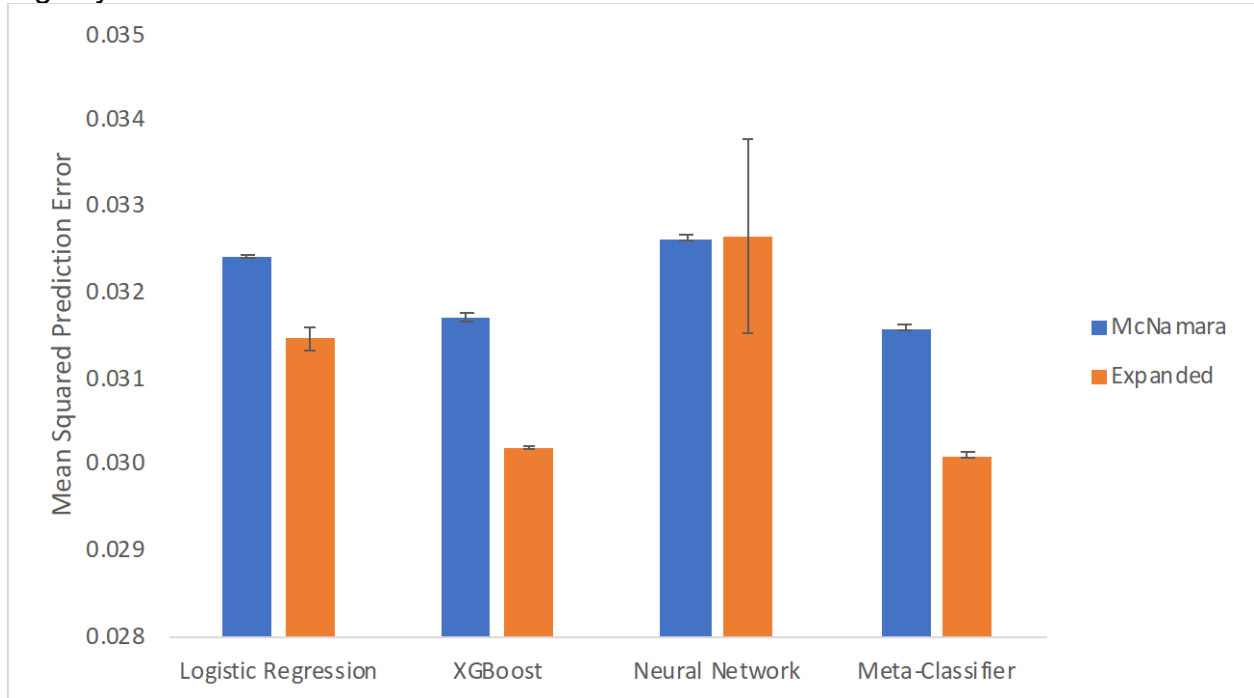

**eFigure 7.** Calibration of Models Developed Using Limited Number of Variables Included in the Current Standard (McNamara et al)

Calibration curves for logistic regression (LR, A), Neural Network (B), XGBoost (C) and Meta-Classifier (D) models for validation cohort predictions. Slope of 1 represents perfect model calibration with values greater than 1 suggesting overestimation of risk and less than 1 suggesting underestimation of risk.

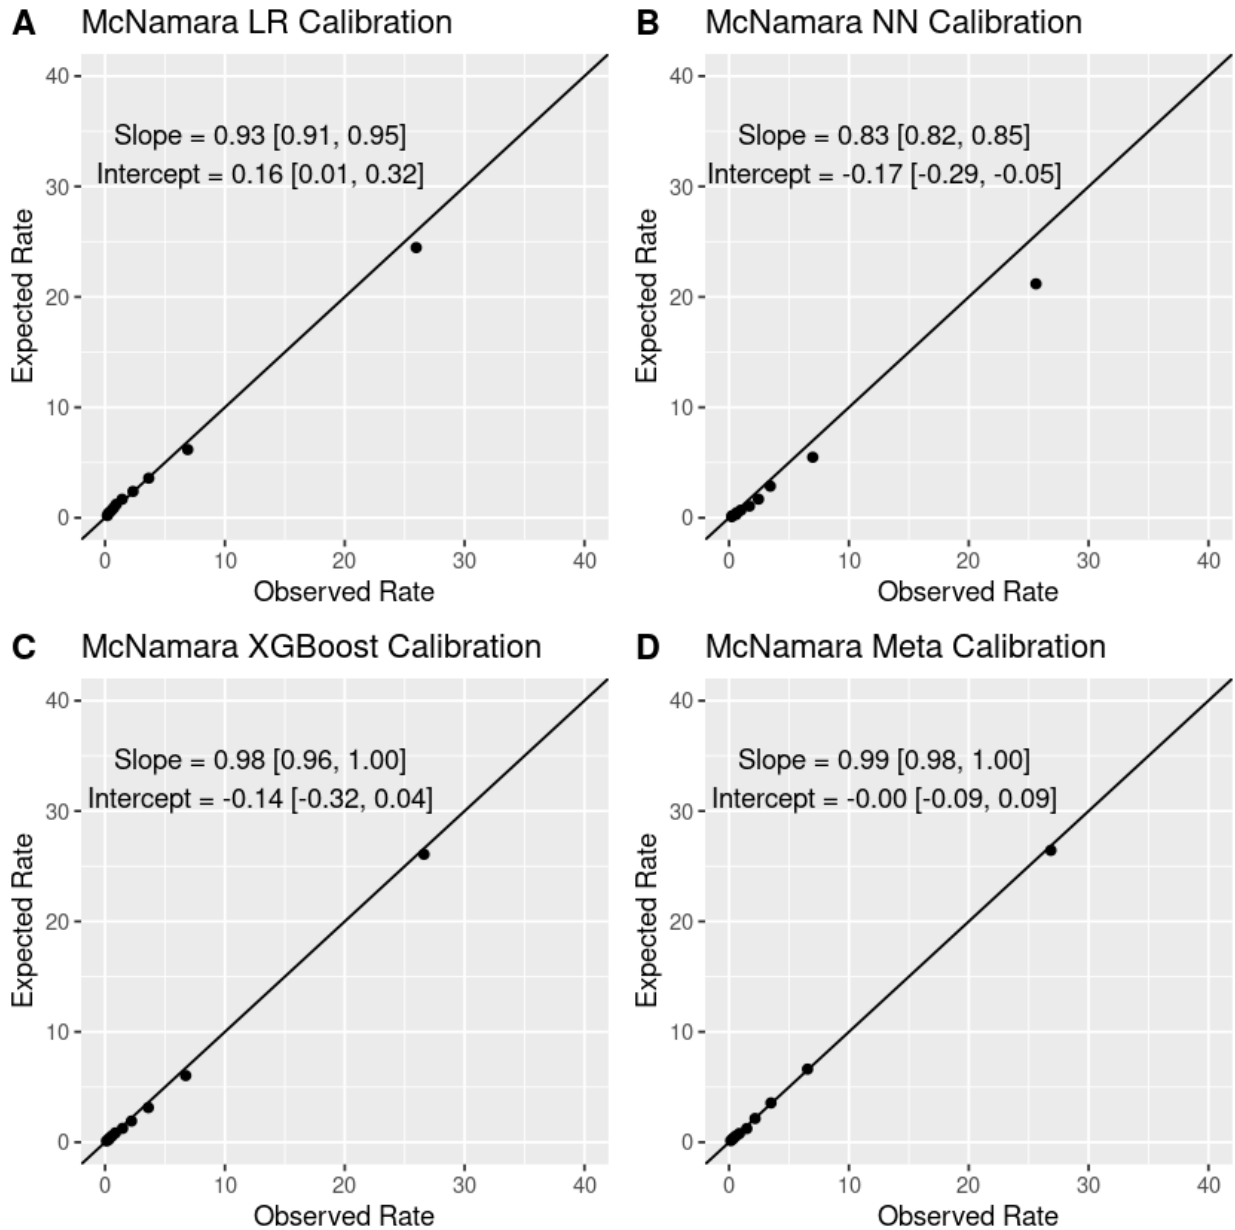

**eFigure 8.** Calibration of Models Developed Using Expanded Number of Variables Included in the Chest Pain-MI Registry

Calibration curves for logistic regression (LR, A), Neural Network (B), XGBoost (C) and Meta-Classifier (D) models for validation cohort predictions. Slope of 1 represents perfect model calibration with values greater than 1 suggesting overestimation of risk and less than 1 suggesting underestimation of risk.

**A** Expanded LR Calibration

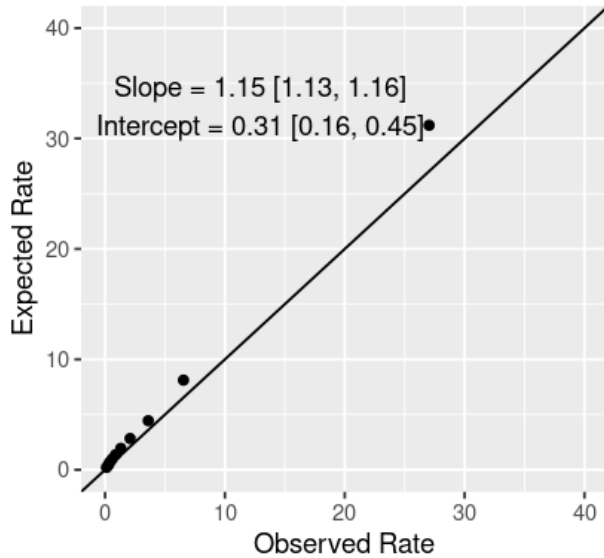

**B** Expanded NN Calibration

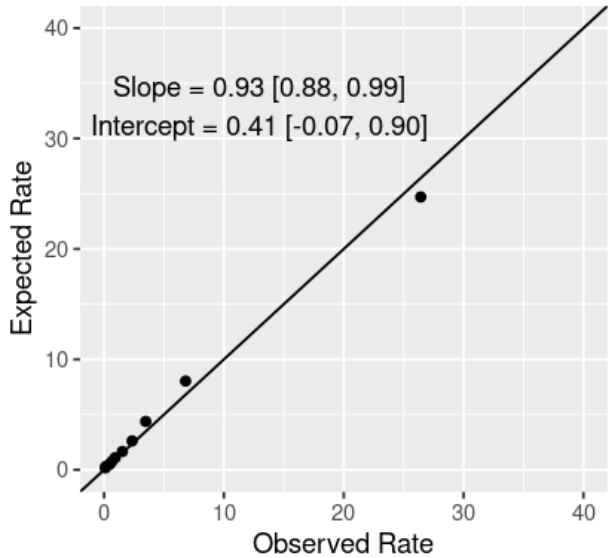

**C** Expanded XGBoost Calibration

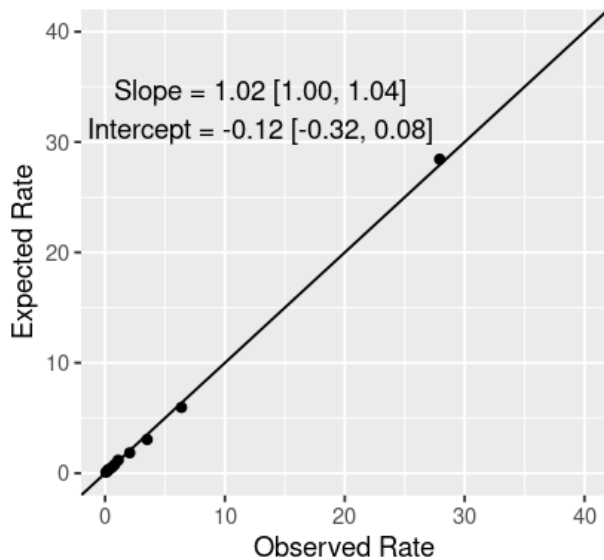

**D** Expanded Meta Calibration

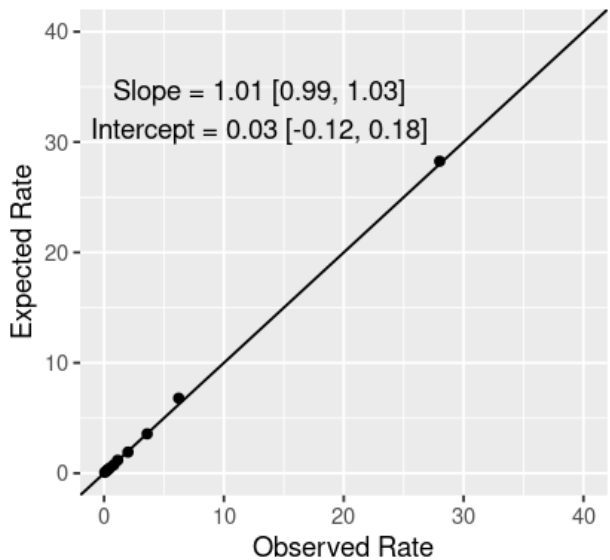

Supplement: jamacardiol-e210122-s001.pdf [file jamacardiol-e210122-s001.pdf]
